# Supplementary material for: Population history of deep-sea vent and seep Provanna snails (Mollusca: Abyssochrysoidea) in the northwestern Pacific
Source: PeerJ. 2018 Sep 26;6:e5673. doi: 10.7717/peerj.5673 (PMC6163031; doi:10.7717/peerj.5673)
Supplement: Table S1 [file peerj-06-5673-s001.xlsx]

## Sheet: Sheet1
Supplemental Table 1: List of DNA sequences obtained in the present study
Species	Name of Haplotype	Accession No.	Frequency
			Off Hatsushima	Mniami-Ensei	Iheya North	Iheya Ridge	Izena (JADE)	Izena (Hakurei)	Irabu	Hatoma	Dai-yon Yonaguni	Kuroshima
Provanna glabra	1	AB810156	1
	2	AB810157	1
	3	AB810158	1
	4	AB810159	1
	5	AB810160	1
	6	AB810161	1
	7	AB810162	1
	8	AB810163	1
	9	AB810164	1
	10	AB810165	1
	11	AB810166	1
	12	AB810167	1
	13	AB810168	1
	14	AB810169	1
	15	AB810170	1
	16	AB810171	1
	17	AB810172	1
	18	AB810173	1
	19	AB810174	1
	20	AB810175	1
	21	AB810176	1
	22	AB810177	1
Provanna lucida	1	AB810178		1
	2	AB810179		5
	3	AB810180		1
	4	AB810181		1
	5	AB810182		7
	6	AB810183		4
	7	AB810184		1
Provanna clathrata	1	AB810200						1
	2	AB810201							1
	3	AB810202							1
	4	AB810203								1
	5	AB810204							1
	6	AB810205							1
	7	AB810206							1
	8	AB810207							1
	9	AB810208							1
	10	AB810209							1
	11	AB810210							1
	12	AB810211							1
	13	AB810212							2
	14	AB810213							2
	15	AB810214							1
	16	AB810215							1
	17	AB810216							1
Provanna subglabra	1	AB810040									1
	2	AB810041						1
	3	AB810042			1
	4	AB810043									1
	5	AB810044									1
	6	AB810045									1
	7	AB810046									1
	8	AB810047									1
	9	AB810048									1
	10	AB810049									1
	11	AB810050									1
	12	AB810051									1
	13	AB810052								1
	14	AB810053									1
	15	AB810054				1
	16	AB810055				1
	17	AB810056									1
	18	AB810057					1
	19	AB810058					1
	20	AB810059					1
	21	AB810060					2
	22	AB810061					1
	23	AB810062					1
	24	AB810063					1
	25	AB810064					1
	26	AB810065					1
	27	AB810066								1
	28	AB810067							1
	29	AB810068							1
	30	AB810069					1
	31	AB810070							1
	32	AB810071							1
	33	AB810072								1
	34	AB810073			1
	35	AB810074							1
	36	AB810075			1
	37	AB810076			1
	38	AB810077			1
	39	AB810078			1
	40	AB810079			1
	41	AB810080			2
	42	AB810081			1
	43	AB810082			1
	44	AB810083			1
	45	AB810084			1
	46	AB810085				1
	47	AB810086				1
	48	AB810087				1
	49	AB810088						1
	50	AB810089			1
	51	AB810090				1
	52	AB810091				1
	53	AB810092								1
	54	AB810093							1
	55	AB810094							1
	56	AB810095							1
	57	AB810096				1
	58	AB810097				1
	59	AB810098							1
	60	AB810099				1
	61	AB810100								1
	62	AB810101								1
	63	AB810102								1
	64	AB810103								1
	65	AB810104								1
	66	AB810105								1
	67	AB810106								1
	68	AB810107							1
	69	AB810108							1
	70	AB810109							1
	71	AB810110							1
	72	AB810111						1
	73	AB810112						1
	74	AB810113						1
	75	AB810114									1
	76	AB810115						1
	77	AB810116						1
	78	AB810117						1
	79	AB810118						1
	80	AB810119						1
	81	AB810120							1
	82	AB810121								1
	83	AB810122			1		2
	84	AB810123									2
	85	AB810124									1
	86	AB810125						1
	87	AB810126			1				1
	88	AB810127								1
	89	AB810128					1
	90	AB810129			1	1
	91	AB810130					2
	92	AB810131				1
	93	AB810132			1
	94	AB810133					1
	95	AB810134							1
	96	AB810135						1
	97	AB810136							1
	98	AB810137					1
	99	AB810138				1	1
	100	AB810139			1
	101	AB810140								1
	102	AB810141						1
	103	AB810142						1
	104	AB810143							2
	105	AB810144							1
	106	AB810145						1
	107	AB810146							1
	108	AB810147									1
	109	AB810148				1
	110	AB810149									1
	111	AB810150				1
	112	AB810151			1
	113	AB810152						1
	114	AB810153				1
	116	AB810155									1
Provanna kuroshimensis	1	AB810185										1
	2	AB810186										1
	3	AB810187										4
	4	AB810188										1
	5	AB810189										2
	6	AB810190										2
	7	AB810191										1
	8	AB810192										1
	9	AB810193										1
	10	AB810194										2
	11	AB810195										1
	12	AB810196										1
	13	AB810197										1
	14	AB810198										1
	15	AB810199										1
Total			22	20	20	16	19	17	38	15	19	21
